# Supplementary material for: The osteoprogenitor-specific loss of ephrinB1 results in an osteoporotic phenotype affecting the balance between bone formation and resorption
Source: PubMed Central journal article supplement (PMC6109077; doi:10.1038/s41598-018-31190-2), 2018-08-24
Supplement: 41598_2018_31190_MOESM1_ESM.pdf [file 41598_2018_31190_MOESM1_ESM.pdf]

**The osteoprogenitor-specific loss of ephrinB1 results in an osteoporotic phenotype affecting the balance between bone formation and resorption**

Agnieszka Arthur<sup>1,2</sup> PhD, Thao M. Nguyen<sup>1,2</sup> PhD, Sharon Paton<sup>1,2,3</sup> BSc, Ana Klisuric<sup>1</sup> BSc Hons, Andrew C.W. Zannettino<sup>2,3</sup> PhD and Stan Gronthos<sup>1,2</sup> PhD.

<sup>1</sup>Mesenchymal Stem Cell Laboratory, Adelaide Medical School, Faculty of Health and Medical Sciences, University of Adelaide, Adelaide 5005, SA, Australia.

<sup>2</sup>South Australian Health and Medical Research Institute, Adelaide 5000, SA, Australia.

<sup>3</sup>Myeloma Research Laboratory, Adelaide Medical School, Faculty of Health and Medical Sciences, University of Adelaide, Adelaide 5005, SA, Australia.

**\*Corresponding author:** Professor Stan Gronthos

Mesenchymal Stem Cell Laboratory, Adelaide Medical School, Faculty of Health and Medical Sciences, University of Adelaide, Adelaide 5005, SA, Australia.

Email: stan.gronthos@adelaide.edu.au

**Running Title: loss of ephrinB1 results in an osteoporotic phenotype**

**Key words:** Osteoporosis, osteoblasts, osteoclasts, molecular pathways – remodelling, Eph/ephrin molecules

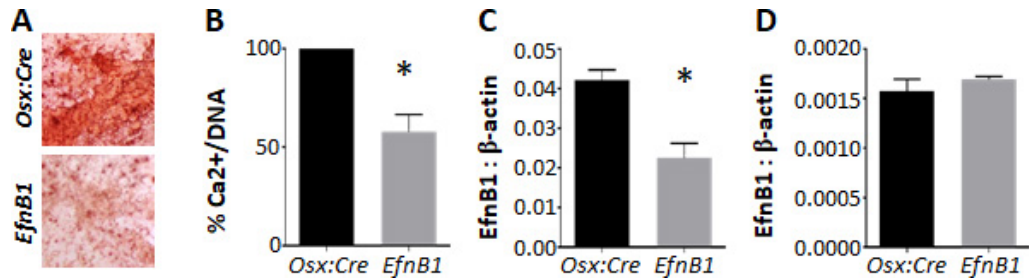

**Supplementary Figure 1. Loss of *EfnB1* in osteoprogenitors mediated through the osterix promoter influences osteoblast in vitro.** (A-C) *Osx:Cre* (*Osx*) and *EfnB1*<sub>OB</sub><sup>-/-</sup> (*EfnB1*) cells were cultured under osteogenic differentiation conditions for 21 days. Cultures were either (A) stained with Alizarin Red, (B) quantitated for calcium ( $\text{Ca}^{2+}$ ) levels and represented as a percentage of  $\text{Ca}^{2+}$ /DNA relative to the *Osx:Cre* control, or (C) isolated for PCR analysis of *ephrinB1* gene expression. (D) *Osx:Cre* and *EfnB1*<sub>OB</sub><sup>-/-</sup> bone marrow cells were cultured under osteoclast conditions. Samples were isolated for PCR analysis of *ephrinB1* gene expression. (All data presented, n = 2-3 mice/strain, \* p<0.05, Student t-test).

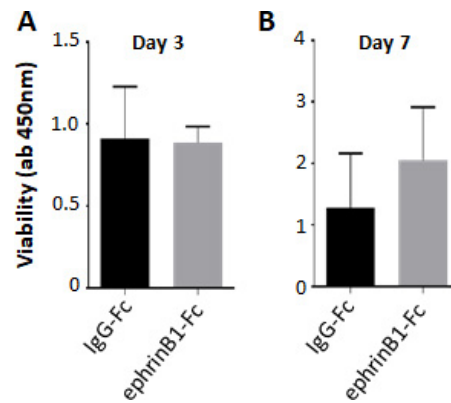

**Supplementary Figure 2. Soluble ephrinB1 does not influence osteoclast precursor viability or metabolic function.** (A-B) Human PBMNC viability and metabolic function was assessed by WST-1 analysis (absorbance 450nm) on (A) Day 3 and (B) Day 7 following osteoclast differentiation, in the presence of human IgG-Fc or ephrinB1-Fc (n = 2 human donors, Student t-test).
